# Candidate Gene Studies of Human Pain Mechanisms

## Methods for Optimizing Choice of Polymorphisms and Sample Size

Inna Belfer, M.D., Ph.D.,\* Tianxia Wu, Ph.D.,† Albert Kingman, Ph.D.,‡ Raj K. Krishnaraju, Ph.D., M.S.,§ David Goldman, M.D.,|| Mitchell B. Max, M.D.¶

THE elucidation of the human genome and proteome offers the clinical researcher the opportunity to test thousands of hypotheses in a single study.<sup>1</sup> Clinical researchers in established areas such as oncology, diabetes, and cardiovascular disease have seized this opportunity. For example, PubMed searches of the disease name with the terms *polymorphism* and *human* yield more than 10,000 citations for cancer and 2,000 for diabetes or hypertension. Although there are many studies examining the genetic risk factors for variations in macroscopic structural disease that may trigger pain—e.g., coronary stenosis, rheumatoid arthritis, or lumbar disc herniation—clinical pain researchers have made little use of these genomic riches to study variations in pain processing, given a uniform initiating injury. The plausibility of clinical pain genetic studies is supported by the recent findings of major differences between inbred mouse strains in the behavioral response to more than 20 different acute and chronic pain conditions, including thermal and chemical stimulation of the skin and viscera

and nerve injury.<sup>2-4</sup> These results suggest that genetic variants affecting pain processing are common and conserved in mammalian populations.

Perhaps pain researchers have neglected clinical genetics because, apart from a few rarities,<sup>5,6</sup> they have not noticed obvious familial inheritance of pain syndromes. However, familial inheritance only becomes obvious for alleles conferring a relative risk (RR) of 50 or more. Association studies, in which the frequencies of common allelic variants are compared in cases and controls, may detect relatively small increases in RR. Such studies have detected alterations in RR in Alzheimer disease, Crohn disease, venous thrombosis, diabetes, schizophrenia, osteoporotic fractures, and other common medical disorders.<sup>7</sup>

Allele-based association studies differ from locus-based family genetic studies in several ways. In family studies, in which the subjects share whole chromosomes or large portions thereof, several hundred genetic markers through the chromosome are sufficient to search the entire genome for a susceptibility locus. Several markers will be on the same preserved chromosome fragment as the disease susceptibility gene. Association studies are generally performed in unrelated individuals in whom only short segments of DNA are shared, so the density of markers studied over any length of DNA must be up to 1,000 times greater than in family studies. Conversely, two advantages of association studies are that they have greater power than family linkage studies to detect genetic effects of slight to modest size,<sup>8</sup> and one has broad latitude in selecting unrelated subjects in a way to optimize the clinical phenotype and to standardize environmental exposures and measurement methods.

Genetic association studies lend themselves to the study of the most perplexing problem in pain research, that after apparently identical structural injuries to a variety of tissues, pain resolves rapidly in most patients and persists in others. Well-studied examples include shingles, diabetic neuropathy, spinal degeneration, limb amputation, mastectomy, thoracotomy, or whiplash injury. Only a small part of the variance in pain persistence has been explained by age, severity of the injury, per-

This article is accompanied by an Editorial View. Please see: Eisenach JC: Fishing for genes: Practical ways to study genetic polymorphisms for pain. ANESTHESIOLOGY 2004; 100:1343-4.

\* Clinical Fellow, § Senior Research Fellow, # Senior Investigator, Pain and Neurosensory Mechanisms Branch, † Statistician, ‡ Chief, Biostatistics Core, Division of Population and Health Promotion Sciences, National Institute of Dental and Craniofacial Research, || Chief, Laboratory of Neurogenetics, National Institute on Alcohol Abuse and Alcoholism, National Institutes of Health.

Received from the Pain and Neurosensory Mechanisms Branch, Division of Intramural Research and the Biostatistics Core, Division of Population and Health Promotion Sciences, National Institute of Dental and Craniofacial Research and the Laboratory of Neurogenetics, National Institute on Alcohol Abuse and Alcoholism, National Institutes of Health, Department of Health and Human Services, Bethesda, Maryland.

Submitted for publication July 28, 2003. Accepted for publication October 27, 2003. Supported by National Institute of Dental and Craniofacial Research Intramural Grant No. Z01 DE00366 and National Institute on Alcohol Abuse and Alcoholism Intramural Grant No. Z01 AA000301 from the National Institutes of Health, Bethesda, Maryland, and Comprehensive Neuroscience Program Grant Uniformed Services University of the Health Sciences G192BR-C4 from the Henry Jackson Foundation, Rockville, Maryland. Presented in part at the Tenth World Congress on Pain, San Diego, California, August 19, 2002.

Address correspondence to Dr. Max: National Institutes of Health, Building 10, 3C-405, Bethesda, Maryland 20892-1258. Address electronic mail to: Mitchell\_Max@nih.gov. Individual article reprints may be purchased through the Journal Web site, [www.anesthesiology.org](http://www.anesthesiology.org).

sonality traits, social support, or economic status.<sup>9,10</sup> Experience with analgesic clinical trials<sup>11,12</sup> suggests that one can best detect pharmacologic effects of moderate size in conditions where the measurable effects of the injury overwhelm the other environmental sources of variance. In contrast, clinical trials in many idiopathic pain conditions without characteristic structural lesions (e.g., fibromyalgia, chronic tension-type headache, irritable bowel disease, nonspecific low back pain) often yield inconsistent results even with large sample sizes. This poor signal-to-noise ratio may be due to the diverse environmental factors that prompt a small proportion of affected subjects to seek medical attention and might lower the sensitivity of genetic studies.

One could theoretically maximize one's chances for success in the candidate gene "lottery" by testing every gene. Technological advances over the next 5–10 yr will probably make it feasible to correlate a trait with multiple markers in every human gene,<sup>1,13</sup> but at current genotyping costs of 20 cents an assay, it would cost \$60,000 per patient to complete a 300,000–single nucleotide polymorphism panel. Moreover, sample sizes in the thousands would be required to overcome the statistical correction for this many multiple comparisons.

With current technology, association studies must restrict their focus to a limited set of candidate genes. The purpose of this article is to propose a systematic approach to improving the odds of success in examining any clinical phenotype in its early stages of genetic analysis. In particular, we will suggest a method to prioritize the choice of candidate polymorphisms and describe the relation between the sample size and the number of candidate loci one can examine simultaneously with adequate power to detect a given RR. Association studies of pain candidate genes have already shown promise<sup>14</sup> and may help to prioritize the hundreds of potential molecular targets for analgesic development, lead to diagnostic tests for risk of chronic pain, or identify novel pain mediators. The strategies outlined below will probably have to be modified in several years based on the actual results of the initial group of human pain candidate gene studies and technical advances in genotyping and bioinformatics.

## Materials and Methods

We devised a method for prioritizing candidate genes and polymorphisms for chronic pain studies by rating each polymorphism in a candidate gene according to three criteria: (1) strength of evidence supporting involvement of the gene in pain processing, (2) frequency of the specific variant, and (3) likelihood that the polymorphism alters function. We assigned each polymorphism zero to three points in each of these categories, with a maximum score of 9.

1. *Involvement in Pain Processing:* We searched recent textbook chapters and reviews<sup>15–17</sup> and the Society of Neuroscience abstracts from 2000 and 2001 to compile a list of approximately 200 molecules (appendix 1) that basic scientists have described to be involved in pain processing. We assigned one point for a single laboratory reporting involvement, two points for reports from multiple groups, and three points if there were multiple reports specifically describing involvement in animal models of neuropathic pain, the focus of our human genetic studies. Molecules without reported involvement in pain processing were excluded from our final priority list, even if they had maximum scores for the two other criteria.

2. *Frequency:* Two authors (I. B., M. B. M.) performed a PubMed search for each of the 200 molecules using the search query [*molecule name*] AND *human* AND *polymorphism* and read pertinent abstracts and articles. We assigned zero points if the population frequency (proportion of all chromosomes) of the variant was less than 3%, one point for 3–10%, two points for 10–30%, and three points for 30–50%.

3. *Function:* We examined articles resulting from the PubMed search for evidence of functional consequences of polymorphisms of the 200 candidate genes. We assigned one point if the variant changed an amino acid; two points for a single report that the variant changed the amount of message or protein expression or function, or was associated with a different clinical outcome from the common allele for a clinical phenotype; and three points for independent replication of any of these types of evidence.

### *Testing Individual Polymorphisms versus Haplotypes*

Most published association studies focus on individual polymorphisms, but the current approach of many laboratories is to type many regularly spaced markers on the candidate gene to determine haplotype blocks, which are combinations of common alleles that occur together over 10- to 100-kilobase lengths of DNA. Over each of these DNA segments, approximately 90% of individuals have one of the two to five most common haplotypes. When loci are present in haplotype blocks, their information can be combined and haplotype can be used as genotype. If approximately six loci are tested per block, there is little loss of power to detect the effect of a moderately abundant but unknown functional locus between the tested markers for that block, compared with testing that locus specifically.<sup>18</sup> In the discussion that follows, we will usually refer to individual polymorphisms, but the same considerations and methods can be applied using the haplotype block as the unit.

**Table 1. Factors Considered in the Determination of Sample Size**

|                                                    |                          |
|----------------------------------------------------|--------------------------|
| Sampling design                                    | Prospective              |
| Statistical power ( $1 - \beta$ )                  | 0.80                     |
| Overall significant level ( $\alpha$ )             | 0.05 (two sided)         |
| Prevalence in population ( $P_2$ )                 | 10%, 20%, 40%            |
| Relative risk of disease (RR)                      | 1.5, 2.0, 2.5            |
| Frequency of the susceptibility (minor) allele (p) | 5%, 10%, 20%, 30%        |
| Genetic model of the candidate genes               | Autosomal and di-allelic |
| Number of candidate genes (k)                      | 1–5,000 (independent)    |

### Sample Size

We assume the investigator is studying a cohort of patients exposed to the same injury or disease and genotyping all of the patients, regardless of whether they develop persistent pain. (If patients are plentiful and inexpensive to screen, genotyping only those with clinical outcomes at either extreme of the range may be more statistically informative and cost efficient.<sup>19</sup>)

Table 1 shows the range of experimental variables we included in the sample size calculations. For ease of calculation, we assume that the outcome is dichotomous—e.g., at a certain time after a uniform injury or disease, patients have either pain or no pain. Somewhat more information would be preserved if pain were analyzed as a lengthier ordinal scale or a continuous measure, yielding slightly greater power.

We assumed an autosomal dominant model of inheritance, i.e., one copy of the minor allele confers the maximal difference in phenotype from the homozygote for the major allele. However, depending on the relation between the phenotype and the amount and function of the protein coded by the gene, the appropriate model may be recessive

(two copies of the minor allele change the phenotype) or codominant (two copies of the minor allele change the phenotype more than one copy). A dominant model will give more optimistic sample size estimates than a recessive model, but one can readily interconvert the two estimates by a method that will be illustrated. A codominant model<sup>14</sup> may offer greater power than the dominant model presented, by providing richer information from the range of zero, one, or two copies of the polymorphic allele.

Sample sizes are separately estimated for 10, 20, or 40% incidences of pain or other outcome of interest. *RR* is the incidence rate of pain in the group “exposed” to one or two variant alleles ( $P_1$ ), divided by the incidence rate in the “unexposed” group ( $P_2$ ) homozygous for the common allele. The association between the candidate genes and pain was assessed by the formulation of the hypothesis  $H_0: P_1 - P_2 = 0$  versus  $H_A: P_1 - P_2 > 0$ , where  $P_1 - P_2$  is the mean of the observed proportions  $p_1 - p_2$  in the exposed and nonexposed groups. The test is based on the two-sample binomial test.

We assume a biallelic model; the candidate genes are in Hardy-Weinberg equilibrium with susceptibility (minor) allele A and normal allele (major) a, and allele A has frequency of p in the population. Thus, in a recruited population, the expected sample size ratio of non-exposed group (aa) to exposed group (AA + Aa) is  $r = (1 - p)^2 / (p^2 + 2p(1 - p))$ . We assume a set of k candidate loci ( $k = 1$  to 5,000) will be investigated. Candidate loci are assumed to be independent of each other. Multiple testing adjustment is performed using the usual Bonferroni error ( $\alpha^* = \alpha/k$ ). Therefore, the sample size could be overestimated, if there is linkage

**Table 2. High-priority Candidate Genes for Human Neuropathic Pain**

| Gene         | Molecule                           | SNP           | Location  | AA Change? | Reference | Frequency |     | Function | Pain | Total |
|--------------|------------------------------------|---------------|-----------|------------|-----------|-----------|-----|----------|------|-------|
|              |                                    |               |           |            |           | %         | No. |          |      |       |
| IL6          | Interleukin 6                      | G 174 C       | Promoter  | No         | 21        | 40        | 3   | 3        | 3    | 9     |
| NOS1         | Neuronal nitric oxide synthase     | AAT VNTR      | Intron 20 | No         | 22<br>23  | 48        | 3   | 3        | 3    | 9     |
| IL1B         | Interleukin 1 $\beta$              | C 511 T       | Promoter  | No         |           | 38        | 3   | 3        | 3    | 9     |
| TNF $\alpha$ | Tumor necrosis factor $\alpha$     | G 308 A       | Promoter  | No         | 24        | 20        | 2   | 3        | 3    | 8     |
| SLC6A4       | Serotonin transporter              | 5HTTLPR       | Promoter  | No         | 25        | 46        | 3   | 3        | 2    | 8     |
| GDNF         | Glial-derived nerve factor         | (AGG)(n)      | 3'-UTR    | No         | 26        | 32        | 3   | 2        | 3    | 8     |
| BDKRB2       | Bradykinin receptor 2              | C 58 T        | Promoter  | No         | 27        | 50        | 3   | 2        | 3    | 8     |
| COMT         | Catechol-O-methyltransferase       | Val 158 Met   | Exon 3    | Yes        | 28        | 46        | 3   | 3        | 2    | 8     |
| NOS2A        | Inducible nitric oxide synthase    | CCTTTn rpt    | Promoter  | No         | 29        | 14        | 2   | 3        | 3    | 8     |
| PDYN         | Prodynorphin                       | 68 bp rpt     | Promoter  | No         | 30        | 30        | 3   | 2        | 3    | 8     |
| OPRM1        | $\mu$ -Opioid receptor             | Asn 40 Asp    | Exon 1    | Yes        | 31        | 13        | 2   | 3        | 3    | 8     |
| IL10         | Interleukin 10                     | A 1082 G      | Promoter  | No         | 32        | 46        | 3   | 2        | 2    | 7     |
| BDKRB1       | Bradykinin receptor 1              | G 699 T       | Promoter  | No         | 33        | 14        | 2   | 2        | 3    | 7     |
| TH           | Tyrosine hydroxylase               | Val 81 Met or | Exon 3    | Yes        | 34        | 31        | 3   | 2        | 2    | 7     |
| RET          | Protooncogene (tyrosine kinase)    | Gly 691 Ser   | Exon 11   | Yes        | 35        | 15        | 2   | 2        | 2    | 7     |
| GRIK3        | Kainate (glutamate) receptor       | Ser 310 Ala   | Coding    | Yes        | 36        | 30        | 3   | 1        | 2    | 6     |
| IL13         | Interleukin 13                     | Arg 130 Gln   | Coding    | Yes        | 37        | 22        | 2   | 2        | 2    | 6     |
| BDNF         | Brain-derived nerve factor         | Val 66 Met    | Exon 5    | Yes        | 38        | 23        | 2   | 1        | 3    | 6     |
| ADRA2A       | $\alpha_{2A}$ -Adrenergic receptor | C 1291 G      | Promoter  | No         | 39        | 23        | 2   | 1        | 3    | 6     |
| CACNA2D2     | Calcium channel subunit            | G 845 C       | Intron 2  | No         | 40        | 22        | 2   | 1        | 3    | 6     |

SNP = single nucleotide polymorphism.



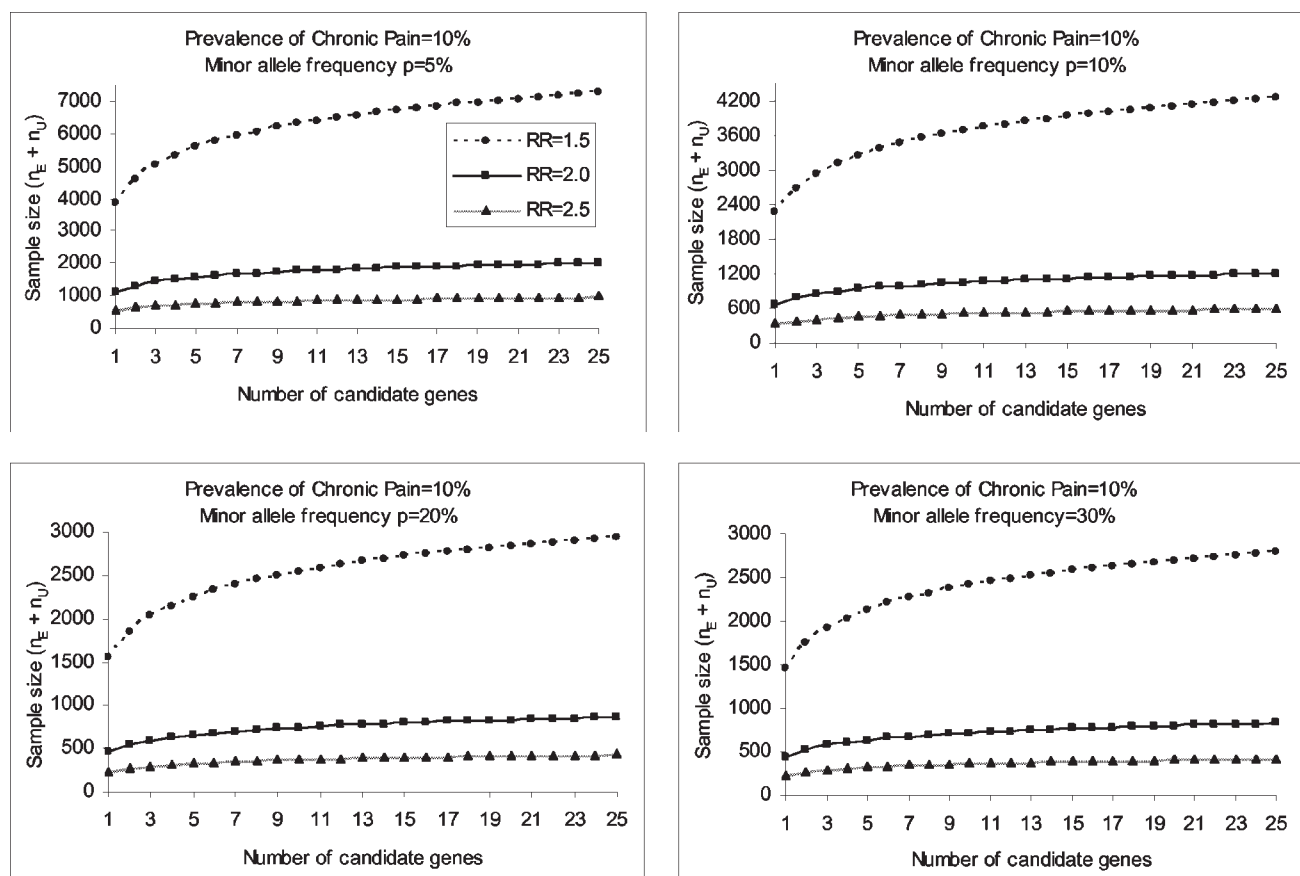

**Fig. 1.** Number of subjects required to detect the association between candidate polymorphisms and increased risk of chronic pain *versus* the number of independent polymorphisms tested. The injury or disease is assumed to produce an incidence of chronic pain = 10% in patients unexposed to the (candidate) minor allele. The *three* curves in each panel correspond to relative risks (RRs) of 1.5, 2.0, and 2.5 conferred by exposure to at least one copy of the minor allele in a dominant model. The *four* panels show population frequency of the minor allele as 5% (*top left*), 10% (*top right*), 20% (*bottom left*), and 30% (*lower left*).  $n_E$  = number exposed;  $n_U$  = number unexposed.

between the candidate genes. Sample sizes were determined assuming RRs of 1.5, 2.0, or 2.5 and minor allele or haplotype frequency ranging from 5 to 30%.

The exposed and unexposed groups generally have unequal sample sizes caused by the disparate frequencies of the major and minor allele for the candidate genes. The sample size for the exposed group ( $n_E$ ) is estimated by (1) and (2) in appendix 2.<sup>20</sup> The sample size for nonexposed group ( $n_U$ ) is then  $n_U = r \cdot n_E$ . The total sample size needed is given as  $N = (r + 1) \cdot n_E$ .

## Results

### Prioritization of Candidate Polymorphisms

Table 2 shows the highest ranked candidate polymorphisms for chronic neuropathic pain studies.<sup>21–40</sup> Even at this early stage of genome research, many candidates ranked high by all our criteria based on replicated peer-reviewed articles. The largest single group code for cytokines that have been implicated in peripheral and central nervous system mechanisms in many studies of neuropathic and inflammatory pain: interleukin (IL)-6,

tumor necrosis factor (TNF)- $\alpha$ , IL-1 $\beta$ , IL-10, and IL-13. Polymorphisms of other inflammatory mediators are also represented, such as neuronal and inducible nitric oxide synthase and the B1 and B2 bradykinin receptors. Other polymorphisms affect genes for neurotransmitters thought to transmit or inhibit pain, their receptors, transporters, and metabolic enzymes: the serotonin transporter, prodynorphin,  $\mu$ -opioid receptor,  $\alpha_2A$ -adrenergic receptor, kainate-3 receptor, catechol-O-methyltransferase, and tyrosine hydroxylase. Another group consists of nerve growth factors and their receptors, such as glial-derived nerve growth factor, its receptor RET, and brain-derived nerve growth factor.

Figures 1–3 show total sample size plotted against the number of independent candidate polymorphisms tested if pain incidence is 10, 20, or 40% in the group without a pain-causing minor allele. (The calculations also apply to searches for pain-preventing alleles.) Within each of the three figures, the four panels represent the cases where the minor alleles have population frequency of 5, 10, 20, or 30%. Within each panel, the three curves represent an RR conferred by the minor allele of 1.5, 2.0, or 2.5. Figure 4

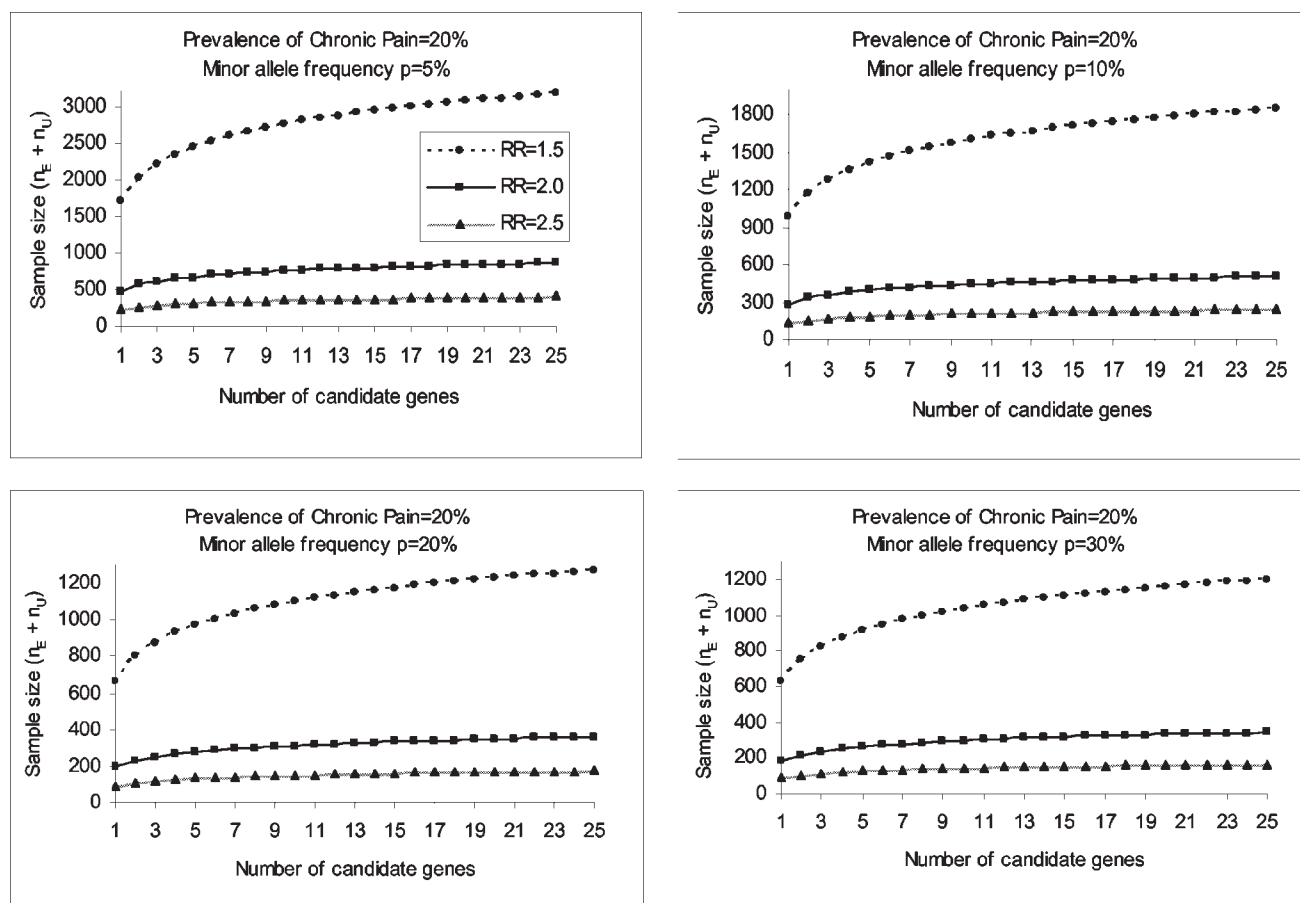

**Fig. 2.** Number of subjects required to detect the association between candidate polymorphisms and increased risk of chronic pain *versus* the number of independent polymorphisms tested. The injury or disease is assumed to produce an incidence of chronic pain = 20% in patients unexposed to the (candidate) minor allele. The *three* curves in each panel correspond to relative risks (RRs) of 1.5, 2.0, and 2.5 conferred by exposure to at least one copy of the minor allele in a dominant model. The *four* panels show population frequency of the minor allele as 5% (*top left*), 10% (*top right*), 20% (*bottom left*), and 30% (*lower left*).  $n_E$  = number exposed;  $n_U$  = number unexposed.

shows similar sample size curves for a case in which one tests up to 5,000 independent polymorphisms.

Figures 1–4 show that the RR is the main factor driving sample size. Although  $N$  increases considerably as one increases the number of candidate genes from 1 to 10 (figs. 1–3), only modest additional increases in  $N$  are needed to test hundreds or thousands of additional loci (fig. 4). As one increases the incidence of the less common phenotype (fig. 1 *vs.* fig. 2 *vs.* fig. 3) or population frequency of the minor allele (four panels within each figure), one can decrease  $N$  almost reciprocally.

For common minor alleles, one can approximate the required sample size from the curves in figures 1–3 that assume a dominant model. For example, consider a recessive model for a study of candidate genes with minor allele frequency of 30%. Nine percent of individuals will be homozygous, so sample sizes will be slightly greater than those illustrated for the dominant model curves in the upper left panels of figures 1–3 for minor allele frequency of 5%, in which case one would expect 9.75% of individuals to have at least one copy of the allele. For less common

minor alleles, one may calculate the proportion of homozygotes,  $p_2^2$ , and approximate the sample size from the curves in the upper left of figures 1–3 using the formula,  $N$  (recessive) = ( $N$  from figure)  $\times$   $0.0975/p_2^2$ . (The exact number will be slightly lower because with rare minor alleles, the large number of unexposed patients allows a small decrease in the number of those “exposed” to the homozygous recessive condition.) For a codominant model, one has a three-group study design, and one would need to make further assumptions regarding the RR pattern before deriving the necessary sample sizes.

## Discussion

Our search of the published pain and human genetics literature identified many attractive candidate polymorphisms, several of which have had preliminary confirmation in the published literature.<sup>14,41</sup> We do not claim that our scoring system is the optimal one or that our priority list includes all of the best candidate genes for neuro-

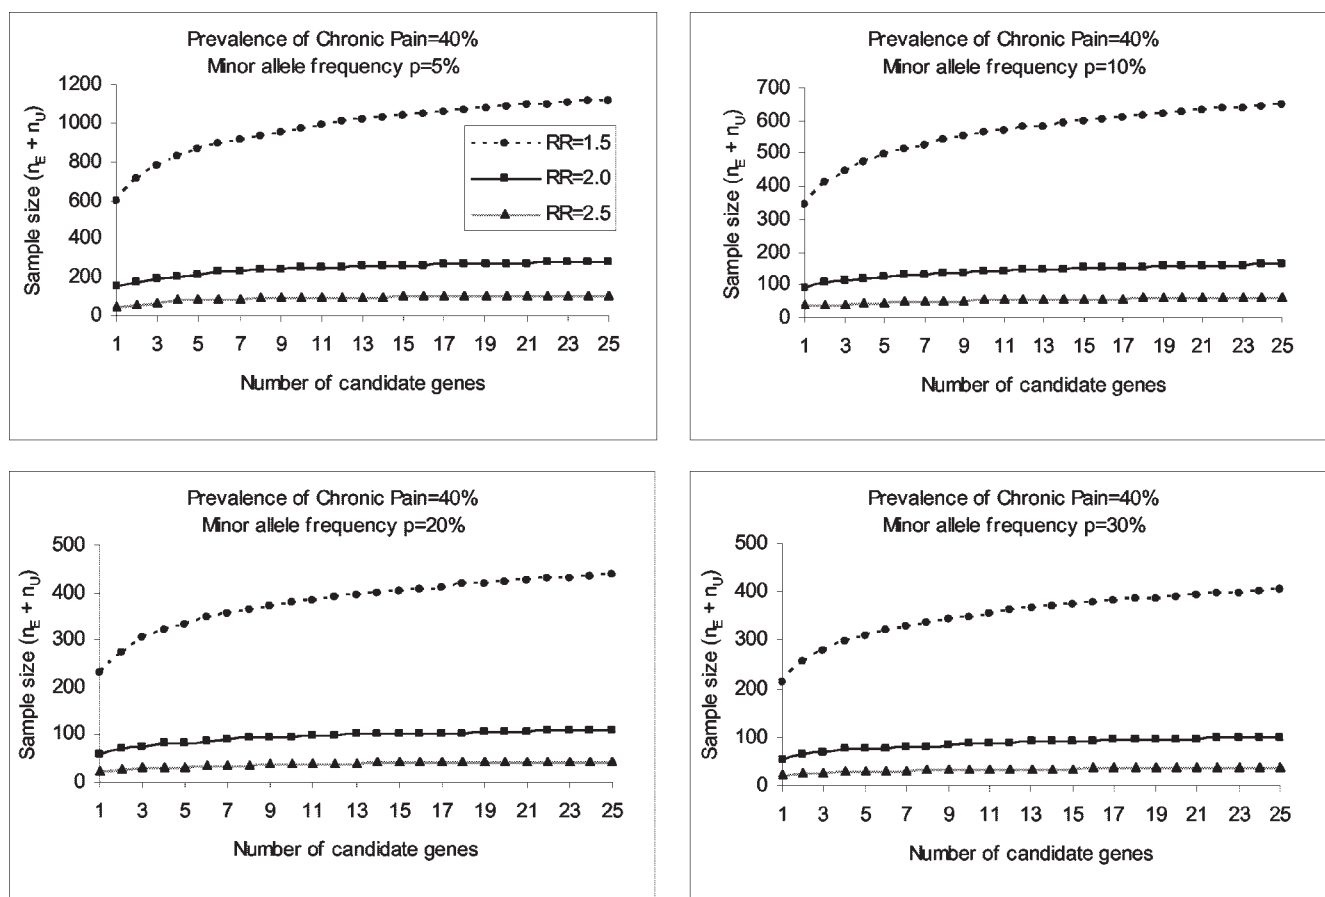

Fig. 3. Number of subjects required to detect the association between candidate polymorphisms and increased risk of chronic pain versus the number of independent polymorphisms tested. The injury or disease is assumed to produce an incidence of chronic pain = 40% in patients unexposed to the (candidate) minor allele. The three curves in each panel correspond to relative risks (RRs) of 1.5, 2.0, and 2.5 conferred by exposure to at least one copy of the minor allele in a dominant model. The four panels show population frequency of the minor allele as 5% (top left), 10% (top right), 20% (bottom left), and 30% (lower left).  $n_E$  = number exposed;  $n_U$  = number unexposed.

pathic pain. We merely wish to illustrate how one might systematically approach the pain and clinical genetics literature to design one's own study.

The prominence of cytokines and other inflammatory mediators on the list may reflect the adaptive value of immune gene mutations to maintain diverse responses to infectious agents.<sup>42</sup> Many of the polymorphisms in table 2 have minor alleles with population frequencies greater than 20%, increasing the power to detect dominant, codominant, or recessive effects, or interactions with common polymorphisms at other loci. Research groups differ on which specific site in many candidate genes is responsible for altered protein expression and disease risk; e.g., there are proponents of multiple rival TNF- $\alpha$ <sup>43</sup> and IL-6 promoter polymorphisms.<sup>44</sup> In such cases if not in all, multiple regularly spaced markers across the gene should be typed.

We have illustrated this prioritization process with a search of the published literature, which was adequate to identify 20 common polymorphisms that have been known long enough to accumulate replicate evidence

for altered function. However, dbSNP, Celera, or other specialized genetic databases are essential for prioritizing the much larger number of polymorphisms recently catalogued by the Human Genome Project or for selecting markers for a haplotype study of any candidate gene.

#### Predicting Functional Effects of Polymorphisms from Gene and Protein Databases

Our current information about the functional consequences of genetic variants lags far behind our knowledge of their location and frequency. In the absence of direct evidence about biochemical function in model systems or clinical phenotype, there are several potential methods for predicting functional impact, which differ according to whether the polymorphism is in a protein-coding region, a promoter region, or an intron. If the polymorphism is in a coding region, one can predict from the triplet code whether the polymorphism leaves the amino acid sequence unchanged, changes an amino acid, or more grossly disrupts translation. Should the amino acid change and the structure of the protein or a

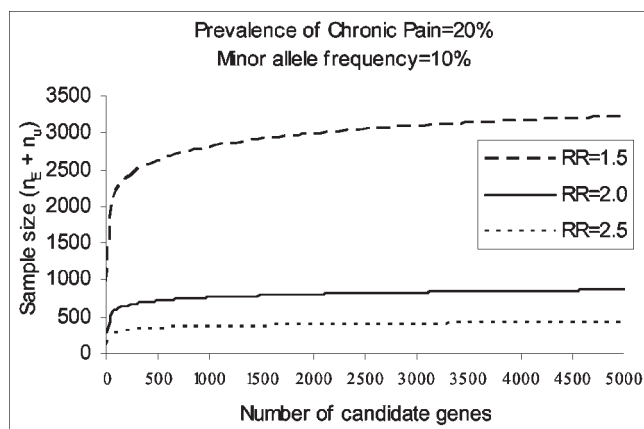

**Fig. 4.** Number of subjects required to detect the association between candidate polymorphisms and increased risk of chronic pain *versus* the number of independent polymorphisms tested in a scan of up to 5,000 loci. The injury or disease is assumed to produce an incidence of chronic pain = 20% in patients unexposed to the (candidate) minor allele. The three curves in each panel correspond to relative risks (RRs) of 1.5, 2.0, and 2.5 conferred by exposure to at least one copy of the minor allele in a dominant model. Population frequencies of the minor alleles are 10%, and two-tailed tests are performed because for most of these markers, the direction of effect on pain is unknown. Note that after reaching a sufficient  $N$  for testing 10–50 markers, modest increases in  $N$  allow many more independent loci to be tested.  $n_E$  = number exposed;  $n_U$  = number unexposed.

homolog is known,\*\* one may assign a score reflecting whether the amino acid change is likely to change structure or binding affinity in a functionally important region of the protein.

If the protein lacks structural homologs in the Protein Data Bank, one may turn to new protein structure-modeling tools that identify secondary ( $\alpha$  helices,  $\beta$  strands, and coils) and tertiary structures. There are several public online methods available for secondary structure predictions, including PSIPRED, PHD, and PROF.††

For three-dimensional structure prediction, homology (also known as *comparative*) modeling or fold recognition methods are used. In homology modeling, the sequence whose structure is to be predicted is derived from a known sequence structure, which has biophysically solved three-dimensional structure in the Protein Data Bank. Homology modeling is not appropriate for proteins that do not have related structural homologs in the three-dimensional data banks. Many proteins differ in sequence similarity but tend to fold in somewhat similar fashion. Several relatively new fold recognition methods detect fold similarities between known three-dimensional

structures by evaluating how well the amino acid sequences of an unknown protein fits into a fold of one of the known three-dimensional structures.<sup>45</sup> Current structural genomics initiatives are rapidly expanding the available catalog of three-dimensional structures of proteins.

Polymorphisms in promoters, which account for most of the high priority pain candidates in table 2, have been shown to affect gene function by changing the three-dimensional structure of the promoter and altering the binding of transcription factors or RNA polymerase. Several bioinformatics resources such as TRANSFAC, Eukaryotic promoter database, Data Base of Transcriptional Start Sites, and rSNP Guide<sup>46</sup> provide instant access to all known promoter sequences and transcription factor binding sites. Novel, yet unknown promoter sequences can be identified by motif search using MEME‡‡ or AlignACE (Aligns Nucleic Acid Conserved Elements)§§ tools, but the development of tools to predict the effect of promoter polymorphisms on function is in its early stages.<sup>47</sup> Polymorphisms within introns may affect gene function by affecting regulatory motifs within introns or RNA splicing mechanisms,<sup>48</sup> but as with promoter polymorphisms, tools to predict these effects from the DNA sequence are not yet available.

#### Sample Size

The sample size calculations emphasize two main points. As the number of patients rises linearly, the number of tests possible goes up approximately exponentially (fig. 4).<sup>49</sup> Because large-scale genotyping costs are expected to decrease rapidly in the next 5 yr, it makes sense to collect samples that will permit studies of hundreds or thousands of candidate alleles or haplotype blocks.<sup>18</sup> Associations of common variants with many diseases<sup>7</sup> have already been replicated even though only a small proportion of human genes have been examined. If common variants affect function enough to cause these diseases, it is plausible that these or other variants may be discovered to affect the risk of persistent pain. The chances of finding such a link will be greater if many or all genes can be studied simultaneously.

Unlike power for additional genetic tests, which can be bought cheaply with a few more patients, one needs large increases in sample size to detect smaller increases in RR (figs. 1–4). The key question, which will only be answered by multiple studies, is the magnitude of RR conferred by pain-related candidate polymorphisms. If the chronic pain phenotype proves analogous to Crohn disease<sup>50</sup> or late-onset Alzheimer disease,<sup>51</sup> where single copies of the NOD2 or ApoE4 allele impart an RR of approximately 3, one can see from figure 4 that collection of several hundred patients will allow thousands of genes to be tested. However, most replicated common variant/common disease associations show RRs between 1.2 and 2.0.<sup>7</sup> RR values of 1.5 or less will require thousands of patients (fig. 4) to sensitively search the genome.

\*\* Protein Data Bank. Available at: <http://www.rcsb.org/pdb>. Accessed November 3, 2003.

†† Available at: <http://www.hgmp.mrc.ac.uk/GenomeWeb/prot-2-struct.html>. Accessed November 3, 2003.

‡‡ GCG software. Available at: [www.accelrys.com](http://www.accelrys.com). Accessed November 3, 2003.

§§ AlignACE. Available at: <http://atlas.med.harvard.edu>. Accessed November 3, 2003.



Pain researchers should not be discouraged by the latter estimate because RR imparted by a polymorphism can be increased by thoughtful definition of the phenotype. For example, the apparent RRs for breast cancer caused by BRCA1 and 2 mutations or those for some candidate genes for early-onset neurodegenerative diseases were increased to readily detectable levels by excluding older patients, in whom most cases were caused by factors other than the allele of interest.

Experience in animal models of pain and randomized trials has shown that the biologic signal-to-noise ratio may be amplified greatly in experimental designs in which there is a relatively severe and uniform injury, pain is assessed at multiple standardized time points to avoid recall bias,<sup>52</sup> and as many relevant covariates as possible are measured and accounted for. The causal links between pain and key covariates, including depression, anxiety, and alcohol and drug abuse, have received little examination in longitudinal studies. The ability to explain these portions of variance would improve the statistical power of genetic studies.

Many polymorphisms differ in frequency among various ethnic groups. Table 2 shows allele frequencies derived from studies of various white populations, but investigators should ascertain the frequencies of polymorphisms of interest in the populations they are considering. If the study population includes more than one ethnic group that differs in prevalence of both the polymorphism of interest and the disease phenotype, the study may be vulnerable to "population stratification" bias, illustrated by the following example. Consider a back pain genetic study performed in a region whose residents belong to the prosperous ethnic group A or the poor immigrants of ethnic group B. Group B subjects are more likely to have chronic back pain because more of them work at hard labor that causes back pain and have additional psychosocial stressors that tend to increase reported pain intensity. If a polymorphism at gene M has nothing to do with spinal degeneration or pain processing but has an allele 1 that is much more frequent in ethnic group B than in group A, an analysis of the whole group (A + B) may show a spurious association between allele 1 and back pain because of the asymmetric economic and occupational stratification of the mixed ethnicity population. Methods for detecting and correcting for population stratification are rapidly evolving<sup>53</sup> and include subanalyses that take into account the confounding variables; the use of family-based designs such as the transmission-disequilibrium test; and new methods such as genomic control, in which one types a large set of genetic markers spaced through the genome to detect and correct for more subtle ancestral subgroups than can be identified by conventional ethnic labels. Reviewers of genetic grant applications and papers often scrutinize the methods for detecting population stratification, so investigators should consult local experts about the most current approaches.

### *Potential Value of Genetic Studies of Human Pain*

Association studies powered to examine many polymorphisms may improve pain diagnosis and therapy. Using current candidate gene technology, pharmaceutical firms could use human data to prioritize among the dozens of potential molecular targets addressed by drugs in their libraries. Such studies would be unable to assess candidate genes containing no common functional variants, but at least one quarter of human genes have common variants changing amino acid sequence in coding regions,<sup>54</sup> and others may cause functionally relevant changes in regulatory regions. As dense whole genome methods become available, human studies may reveal either totally novel therapeutic targets or provide information to help basic scientists to prioritize research on the hundreds of molecules up-regulated or down-regulated by painful injuries.<sup>55-57</sup>

Most of our discussion has emphasized the potential of large studies to search many polymorphisms, but some clinical researchers may contemplate adding the assays of several polymorphisms as a secondary aim in smaller studies of pain treatment or physiology. Our analysis suggests that this may only be worthwhile if the polymorphisms are common and have substantial functional effects. In large or small studies, investigators might modify the criteria and weightings that we used in our candidate prioritization, but we suggest that they plan the research program systematically at the start, rather than merely test for any polymorphism whose assay happens to be available. The risk of the latter approach is that were the researcher lucky enough to hit on an important variant, the statistical correction for multiple tests might make it difficult to persuade a reviewer this was more than a chance result. An alternative to our approach of skimming the most attractive candidates from all categories of pain mediators might be to choose a group of candidate genes all involved with the same aspect of pain processing, even if major effects of the polymorphisms on function have not yet been proven. In this case, collection of outcome measures would be intensively focused on that aspect of pain.

The design of future genetic studies of pain will be shaped by future insights into fundamental questions about pain, such as whether subtypes of musculoskeletal, neuropathic, and visceral pain are processed by mostly similar or differing mechanisms.

Genetic methods may be among the most powerful tools available to answer these questions. We hope that clinical pain researchers will take full advantage of the new genomic resources to make human pain studies the equal of animal research as a source of fundamental discoveries.

The authors thank Raymond A. Dionne, D.D.S., Ph.D. (Chief, Pain and Neurosensory Mechanisms Branch, National Institute of Dental and Craniofacial Research, National Institutes of Health, Bethesda, Maryland), and Michael J. Iadrola, Ph.D. (Senior Investigator, Pain and Neurosensory Mechanisms Branch, National Institute of Dental and Craniofacial Research, National Institutes of



Health), for helpful discussions, and Brendan O'Donnell, M.D., Suzan Khoromi, M.D., and Hyung-Suk Kim, D.D.S., Ph.D. (all Clinical Fellows, Pain and Neurosensory Mechanisms Branch, National Institute of Dental and Craniofacial Research, National Institutes of Health), for reviewing the manuscript.

## References

- Lander ES: The new genomics: Global views of biology. *Science* 1996; 274:536-9
- Mogil JS, Wilson SG, Bon K, Lee SE, Chung K, Raber P, Pieper JO, Hain HS, Belknap JK, Hubert L, Elmer G, Chung JM, Devor M: Heritability of nociception: I. Responses of 11 inbred mouse strains on 12 measures of nociception. *Pain* 1999; 80:67-82
- Lariviere WR, Wilson SG, Laughlin TM, Kokayeff A, West EE, Adhikari SM, Wan Y, Mogil JS: Heritability of nociception: III. Genetic relationships among commonly used assays of nociception and hypersensitivity. *Pain* 2002; 97:75-86
- Seltzer Z, Wu T, Max MB, Diehl SR: Mapping a gene for neuropathic pain-related behavior following peripheral neurectomy in the mouse. *Pain* 2001; 93:101-6
- Nagasako EM, Oaklander AL, Dworkin RH: Congenital insensitivity to pain: An update. *Pain* 2003; 101:213-9
- Carrera P, Stenirri S, Ferrari M, Battistini S: Familial hemiplegic migraine: An ion channel disorder. *Brain Res Bull* 2001; 56:239-41
- Lohmueller KE, Pearce CL, Pike M, Lander ES, Hirschhorn JN: Meta-analysis of genetic association studies supports a contribution of common variants to susceptibility to common disease. *Nat Genet* 2003; 33:177-82
- Risch N, Merikangas K: The future of genetic studies of complex human diseases. *Science* 1996; 273:1516-7
- Atlas SJ, Deyo RA, Keller RB, Chapin AM, Patrick DL, Long JM, Singer DE: The Maine Lumbar Spine Study: II. 1-Year outcomes of surgical and nonsurgical management of sciatica. *Spine* 1996; 21:1777-86
- Dworkin RH, Nagasako EM, Johnson RW, Griffin DR: Acute pain in herpes zoster: The Famciclovir Database Project. *Pain* 2001; 94:113-9
- Houde RW, Wallenstein SI, Beaver WT: Clinical measurement of pain, Analgesics. Edited by de Stevens G. New York, Academic Press, 1965, pp 75-122
- Max MB, Portenoy RK, Laska EM, eds. The Design of Analgesic Clinical Trials. *Advances in Pain Research and Therapy*. Vol. 18. New York, Raven Press, 1991, pp 1-605
- Botstein D, Risch N: Discovering genotypes underlying human phenotypes: Past successes for Mendelian disease, future approaches for complex disease. *Nat Genetics Suppl* 2003; 33:228-37
- Zubieta JK, Heitzeg MM, Smith YR, Bueller JA, Xu K, Xu Y, Koeppe RA, Stohler CS, Goldman D: COMT val158met genotype affects mu-opioid neurotransmitter responses to a pain stressor. *Science* 2003; 299:1240-3
- Wall PD, Melzack R, eds. *Textbook of Pain*, 4th edition. Edinburgh, Churchill Livingstone, 1999, pp 11-182, 253-330
- Woolf CJ, Salter MW: Neuronal plasticity: Increasing the gain in pain. *Science* 288:1765-9, 2000
- Wood JN, Perl ER: Pain. *Curr Opin Genet Dev* 1999; 9:328-32
- Gabriel SB, Schaffner SF, Nguyen H, Moore JM, Roy J, Blumenstiel B, Higgins J, Defelice M, Lochner A, Faggart M, Liu-Cordero SN, Rotimi C, Adeyemo A, Cooper R, Ward R, Lander ES, Daly MJ, Altshuler D: The structure of haplotype blocks in the human genome. *Science* 2002; 296:2225-9
- Risch N, Zhang H: Extreme discordant sib pairs for mapping quantitative trait loci in humans. *Science* 1995; 268:1584-9
- Fleiss J: *Statistical Methods for Rates and Proportions*, 2nd edition. New York, Wiley, 1981, pp 44-5
- Fishman D, Faulds G, Jeffery R, Mohamed-Ali V, Yudkin JS, Humphries S, Woo P: The effect of novel polymorphisms in the interleukin-6 (IL-6) gene on IL-6 transcription and plasma IL-6 levels, and an association with systemic-onset juvenile chronic arthritis. *J Clin Invest* 1998; 102:1369-76
- Grasemann H, Knauer N, Buscher R, Hubner K, Drzen JM, Ratjen F: Airway nitric oxide levels in cystic fibrosis patients are related to a polymorphism in the neuronal nitric oxide synthase gene. *Am J Respir Crit Care Med* 2000; 162:2172-6
- Nemetz A, Toth M, Garcia-Gonzalez MA, Zagoni T, Feher J, Pena AS, Tulassay Z: Allelic variation at the interleukin 1beta gene is associated with decreased bone mass in patients with inflammatory bowel diseases. *Gut* 2001; 49:644-9
- O'Keefe GE, Hybki DC, Munford RS: The G-308 A single nucleotide polymorphism at the -308 position in the tumor necrosis-alpha promoter increases the risk for severe sepsis after trauma. *J Trauma* 2002; 52:817-25
- Neumeister A, Konstantinidis A, Stastny J, Schwarz MJ, Vitouch O, Willeit M, Praschak-Rieder N, Zach J, de Zwaan M, Bondy B, Ackenheil M, Kasper S: Association between serotonin transporter gene promoter polymorphism (5HTTLPR) and behavioral responses to tryptophan depletion in healthy women with and without family history of depression. *Arch Gen Psychiatry* 2002; 59:613-20
- Lee K, Kunugi H, Nanko S: Glial cell line-derived neurotrophic factor (GDNF) gene and schizophrenia: Polymorphism screening and association analysis. *Psychiatry Res* 2001; 104:11-7
- Mukae S, Aoki S, Itoh S, Iwata T, Ueda H, Katagiri T: Bradykinin B(2) receptor gene polymorphism is associated with angiotensin-converting enzyme inhibitor-related cough. *Hypertension* 2000; 36:127-31
- Egan MF, Goldberg TE, Kolachana BS, Callicott JH, Mazzanti CM, Straub RE, Goldman D, Weinberger DR: Effect of COMT Val108/158 Met genotype on frontal lobe function and risk for schizophrenia. *Proc Natl Acad Sci U S A* 2001; 98:6917-22
- Xu W, Liu L, Emson P, Harrington CR, McKeith IG, Perry RH, Morris CM, Charles IG: The CCTTT polymorphism in the NOS2A gene is associated with dementia with Lewy bodies. *Neuroreport* 2000; 58:154-6
- Chen AC, LaForge KS, Ho A, McHugh PF, Kellogg S, Bell K, Schlager RP, Leal SM, Kreck MJ: Potentially functional polymorphism in the promoter region of prodynorphin gene may be associated with protection against cocaine dependence or abuse. *Am J Med Genet* 2002; 114:429-35
- Sander T, Berlin W, Gscheidel N, Wendel B, Janz D, Hoehe MR: Genetic variation of the human mu-opioid receptor and susceptibility to idiopathic absence epilepsy. *Epilepsy Res* 2000; 39:57-61
- Suarez A, Castro P, Alonso R, Mozo L, Gutierrez C: Interindividual variations in constitutive interleukin-10 messenger RNA and protein levels and their association with genetic polymorphisms. *Transplantation* 2003; 15:711-7
- Zychma MJ, Gumprecht J, Zukowska-Szczecawska E, Grzeszczak W: Polymorphisms in the genes encoding for human kinin receptors and the risk of end-stage renal failure: Results of transmission/disequilibrium test. The End-Stage Renal Disease Study Group. *J Am Soc Nephrol* 1999; 10:2120-4
- Linhart A, Jindra A, Golan L, Jachymova M, Sedlacek K, Peleska J, Unerova V, Bultas J, Horky K, Aschermann M: Association between tyrosine hydroxylase polymorphisms and left ventricular structure in young normotensive men. *J Biomed Sci* 2002; 59:90-4
- Bounacer A, Du Villard JA, Wicker R, Caillou B, Schlumberger M, Sarasin A, Suarez HG: Association of RET codon 691 polymorphism in radiation-induced human thyroid tumours with C-cell hyperplasia in peritumoural tissue. *Br J Cancer* 2002; 86:1929-36
- Begni S, Popoli M, Meraschi S, Bignotti S, Tura GB, Gennarelli M: Association between the ionotropic glutamate receptor kainate3 (GRIK3) ser310ala polymorphism and schizophrenia. *Mol Psychiatry* 2002; 7:416-8
- DeMeo DL, Lange C, Silverman EK, Senter JM, Drzen JM, Barth MJ, Laird N, Weiss ST: Univariate and multivariate family-based association analysis of the IL-13 ARG130GLN polymorphism in the Childhood Asthma Management program. *Genet Epidemiol* 2002; 23:335-48
- Egan MF, Kojima M, Callicott JH, Goldberg TE, Kolachana BS, Bertolino A, Zaitsev E, Gold B, Goldman D, Dean M, Lu B, Weinberger DR: The BDNF val66met polymorphism affects activity-dependent secretion of BDNF and human memory and hippocampal function. *Cell* 2003; 112:257-69
- Rosmond R, Bouchard C, Bjorntorp P: A C-1291G polymorphism in the alpha2A-adrenergic receptor gene (ADRA2A) promoter is associated with cortisol escape from dexamethasone and elevated glucose levels. *J Intern Med* 2002; 251:252-7
- Angeloni D, Wei MH, Duh FM, Johnson BE, Lerman MI: A G-to-A single nucleotide polymorphism in the human alpha 2 delta 2 calcium channel subunit gene that maps at chromosome 3p21.3. *Mol Cell Probes* 2000; 14:53-4
- Shoskes DA, Albakri Q, Thomas K, Cook D: Cytokine polymorphisms in men with chronic prostatitis: Association with diagnosis and treatment response. *J Urol* 2002; 168:331-5
- Murphy PM: Molecular mimicry and the generation of host defense protein diversity. *Cell* 1993; 72:823-6
- Zeggini E, Thomson W, Kwiatkowski D, Richardson A, Ollier W, Donn R: Linkage and association studies of single-nucleotide polymorphism-tagged tumor necrosis factor haplotypes in juvenile oligoarthritis. *Arthritis Rheum* 2002; 46:3304-11
- Ferrari SL, Ahn-Luong L, Garnerio P, Humphries SE, Greenspan SL: Two promoter polymorphisms regulating interleukin-6 gene expression are associated with circulating levels of C-reactive protein and markers of bone resorption in postmenopausal women. *J Clin Endocrinol Metab* 2003; 88:255-9
- Carugo O, Pongor S: Recent progress in protein 3D structure comparison. *Curr Protein Pept Sci* 2002; 3:441-9
- Praz V, Périer R, Bonnard C, Bucher B: The Eukaryotic Promoter Database, EPD: New entry types and links to gene expression data. *Nucleic Acids Res* 2002; 30:322-4
- Ponomarenko JV, Merkulova TI, Orlova GV, Fokin ON, Gorshkova EV, Frolov AS, Valuev VP, Ponomarenko MP: rSNP\_Guide, a database system for analysis of transcription factor binding to DNA with variations: Application to genome annotation. *Nucleic Acids Res* 2003; 31:118-21
- Mendell JT, Dietz HC: When the message goes awry: Disease-producing mutations that influence mRNA content and performance. *Cell* 2001; 107:411-4
- McCarthy JJ, Hilfiker R: The use of single-nucleotide polymorphism maps in pharmacogenomics. *Nat Biotechnol* 2000; 18:505-8
- Cuthbert AP, Fisher SA, Mirza MM, King K, Hampe J, Croucher PJ, Mascheretti S, Sanderson J, Forbes A, Mansfield J, Schreiber S, Lewis CM, Mathew CG: The contribution of NOD2 gene mutations to the risk and site of disease in inflammatory bowel disease. *Gastroenterology* 2000; 122:867-74
- Kukull WA, Schellenberg GD, Bowen JD, McCormick WC, Yu CE, Teri L, Thompson JD, O'Meara ES, Larson EB: Apolipoprotein E in Alzheimer's disease risk and case detection: A case-control study. *J Clin Epidemiol* 1996; 49:1143-8
- Dawson EG, Kanim LE, Sra P, Dorey FJ, Goldstein TB, Delamarter RB, Sandhu HS: Low back pain recollection versus concurrent accounts: Outcomes analysis. *Spine* 2002; 27:984-93

53. Cardon LR, Palmer LJ: Population stratification and spurious allelic association. *Lancet* 2003; 361:598–604
54. Adams MD, Celniker SE, Holt RA, Evans CA, Gocayne JD, Amanatides PG, Scherer SE, Li PW, Hoskins RA, Galle RF, George RA, Lewis SE, Richards S, Ashburner M, Henderson SN, Sutton GG, Wortman JR, Yandell MD, Zhang Q, Chen LX, Brandon RC, Rogers YH, Blazek RG, Champe M, Pfeiffer BD, Wan KH, Doyle C, Baxter EG, Helt G, Nelson CR, Gabor GL, Abril JF, Agbayani A, An HJ, Andrews-Pfannkoch C, Baldwin D, Ballew RM, Basu A, Baxendale J, Bayraktaroglu L, Beasley EM, Beeson KY, Benos PV, Berman BP, Bhandari D, Bolshakov S, Borkova D, Botchan MR, Bouck J, Brokstein P, Brottier P, Burtis KC, Busam DA, Butler H, Cadieu E, Center A, Chandra I, Cherry JM, Cawley S, Dahlke C, Davenport LB, Davies P, de Pablos B, Delcher A, Deng Z, Mays AD, Dew I, Dietz SM, Dodson K, Doup LE, Downes M, Dugan-Rocha S, Dunkov BC, Dunn P, Durbin KJ, Evangelista CC, Ferraz C, Ferreira S, Fleischmann W, Fosler C, Gabrielian AE, Garg NS, Gelbart WM, Glasser K, Glodek A, Gong F, Gorrell JH, Gu Z, Guan P, Harris M, Harris NL, Harvey D, Heiman TJ, Hernandez JR, Houck J, Hostin D, Houston KA, Howland TJ, Wei MH, Ibegwam C, Jalali M, Kalush F, Karpen GH, Ke Z, Kennison JA, Ketchum KA, Kimmel BE, Kodira CD, Kraft C, Kravitz S, Kulp D, Lai Z, Lasko P, Lei Y, Levitsky AA, Li J, Li Z, Liang Y, Lin X, Liu X, Mattei B, McIntosh TC, McLeod MP, McPherson D, Merkulov G, Milshina NV, Mobarry C, Morris J, Moshrefi A, Mount SM, Moy M, Murphy B, Murphy L, Muzny DM, Nelson DL, Nelson DR, Nelson KA, Nixon K, Nusskern DR, Pacle JM, Palazzolo M, Pittman GS, Pan S, Pollard J, Puri V, Reese MG, Reinert K, Remington K, Saunders RD, Scheeler F, Shen H, Shue BC, Siden-Kiamos I, Simpson M, Skupski MP, Smith T, Spier E, Spradling AC, Stapleton M, Strong R, Sun E, Svirskas R, Tector C, Turner R, Venter E, Wang AH, Wang X, Wang ZY, Wassarman DA, Weinstock GM, Weissenbach J, Williams SM, Woodage T, Worley KC, Wu D, Yang S, Yao QA, Ye J, Yeh RF, Zaveri JS, Zhan M, Zhang G, Zhao Q, Zheng L, Zheng XH, Zhong FN, Zhong W, Zhou X, Zhu S, Zhu X, Smith HO, Gibbs RA, Myers EW, Rubin GM, Venter JC: The sequence of the human genome. *Science* 2001; 291:1304–51
55. Wang H, Sun H, Della Penna K, Benz RJ, Xu J, Gerhold DL, Holder DJ, Koblan KS: Chronic neuropathic pain is accompanied by global changes in gene expression and shares pathobiology with neurodegenerative diseases. *Neuroscience* 2002; 114:529–46
56. Costigan M, Belfort K, Karchewski L, Griffin RS, D'Urso D, Allchorne A, Sitarski J, Mannion JW, Pratt RE, Woolf CJ: Replicate high-density rat genome oligonucleotide microarrays reveal hundreds of regulated genes in the dorsal root ganglion after peripheral nerve injury. *BMC Neurosci* 2002; 3:16
57. Yang HY, Wilkening S, Iadarola MJ: Spinal cord genes enriched in rat dorsal horn and induced by noxious stimulation identified by subtraction cloning and differential hybridization. *Neuroscience* 2001; 103:493–502

## Appendix 1: List of Putative Pain-related Molecules Used in Prioritization

### *Neurotransmitters, Receptors, Transporters, and Metabolic Enzymes*

Opioid receptors ( $\mu$ ,  $\delta$ , and  $\kappa$ )  
Orphanin receptor  
Nociceptin  
Proopiomelanocortin  
Prodynorphin  
Preproenkephalin  
Endomorphin  
Neurokinin-1 receptor  
Neurokinin-2 receptor  
Neurokinin-3 receptor  
N-methyl-D-aspartate receptor: NMDA R1 subunit, R2A–D subunit  
AMPA/kainate receptors  
Glutamate transporter  
 $\gamma$ -Aminobutyric acid, GABA<sub>A</sub>, GABA<sub>B</sub> receptors and subtypes  
Peripheral benzodiazepine receptor  
Bradykinin receptors (BK1, BK2)  
Vanilloid receptor, vanilloid receptor-like protein (VRP)  
Pain-related cation-channel receptor (P2X3)  
Corticotropin-releasing factor  
Calcitonin gene-related peptide and its receptor  
Galanin and receptor  
Cholecystokinin A and B receptors and precholecystokinin  
Imidazoline receptor (I2)  
Neurotensin and its receptors  
Nicotinic cholinergic receptors  
Muscarinic cholinergic M1 and M2 receptors

Vasoactive intestinal polypeptide and receptor  
Serotonin receptors (5HT1A, B/D, 5HT2, 5HT3)  
Serotonin transporter  
Nonopioid  $\sigma$ 1 and 2 receptors  
Somatostatin 2A receptor  
Prostaglandin receptors (EP1–4)  
Neuronal nitric oxide synthase (NOS1)  
Inducible nitric oxide synthase (NOS2A)  
Glutamate carboxypeptidase II  
Adenosine kinase adenosine 1 and 2A receptors  
Adenosine transporter  
Equilibrative nucleoside transporter (ENT)  
Glycine receptor and transporter  
Cannabinoid receptor anandamide  
Endothelin-1 and ET-A receptor  
 $\alpha_1$ - and  $\alpha_{2A}$ -adrenergic receptors  
Orexin B/hypocretin

### *Ion Channels*

Na: Voltage-gated Na<sup>+</sup> channels  $\alpha$  and  $\beta$  subunits  
Tetrodotoxin-resistant sodium channel (SNS)  
Sensory neuron-specific sodium channel (SNS-1)  
Epithelial sodium channel/degenerin (DEG/Enac)  
Amiloride-sensitive epithelial sodium channel (BnAC2)  
Potassium channels (GIRKs)  
Calcium: N type,  $\alpha_{1B}$  subunit  
Voltage-dependent,  $\alpha_{2\delta}$  subunit

### *Inflammatory Mediators and Their Receptors*

Interleukin 1 $\alpha$ ,  $\beta$ , and  $\gamma$  receptors  
Interleukin 2 receptor  $\beta$   
Interleukin 6  
Interleukin 12  
Interleukin 10  
Interleukin 13  
Tumor necrosis factor  $\alpha$  and receptors (TNFR I, II)  
Protease-activated receptor  
Cyclooxygenase 1, 2  
Leukemia inhibitory factor (LIF)  
Phospholipase type 2  
Lipoxygenase

### *Growth Factors and Their Receptors*

Nerve growth factor and neurotrophin receptor (Trk1)  
Brain-derived neurotrophic factor (BDNF)  
Neurotrophin receptors (NT 4/5, Trk B, NT3, Trk C)  
Glial cell line-derived neurotrophic factor (GDNF)  
GDNF family receptor alpha 1 (GFR $\alpha$ 1)  
Protooncogene (tyrosine kinase)  
Low-affinity neurotrophin receptor (P 75 receptor)  
Phospholipase C ( $\gamma$ 1 and  $\beta$ )  
Artemin  
GDNF family receptor  $\alpha$ 3 (GFR $\alpha$ 3)

### *Intracellular Messengers*

Extracellular signal-regulated protein kinase 1, 2  
p38 mitogen-activated kinase (p38 MAPK)  
Guanylyl-5'-O-( $\gamma$ -thio)-triphosphate  $\gamma$ S  
Calcium calmodulin kinase II and II $\alpha$   
Phospholipase C  $\beta$ 4  
Phospholipase C  $\gamma$  and  $\epsilon$   
Phosphorylated (activated) cyclic AMP response element binding protein  
Regulator of G-protein signaling (RSG3)  
Protein kinase A

Phosphoinositol-3-kinase  
 Sphingomyelinase  
 G protein-coupled receptor kinase 2  
 Nuclear factor  $\kappa$ B  
 Protein kinase B (Akt)  
 Protein tyrosine kinase (Src)

## Appendix 2

The statistic used to compare proportions can be written as

$$z = \frac{p_1 - p_2 - \frac{1}{2n_E} \left( \frac{r+1}{r} \right)}{\sqrt{\frac{\bar{p}\bar{q}(r+1)}{rn_E}}},$$

where  $\bar{p} = (p_1 + rp_2)/(r+1)$  and  $\bar{q} = 1 - \bar{p}$ . The needed sample size for control group is given as  $n_C = r \cdot n_E$ . The continuity correction is given by the formula

$$n_E = \frac{m}{4} \left[ 1 + \sqrt{1 + \frac{2(r+1)}{mr(P_1 - P_2)}} \right]^2 \quad (1)$$

for the uncorrected version derived by

$$m = \frac{[z_\alpha \sqrt{(r+1)\bar{P}\bar{Q}} - z_{1-\beta} \sqrt{rP_1Q_1 + P_2Q_2}]^2}{r(P_1 - P_2)^2}, \quad (2)$$

where  $Q_1 = 1 - P_1$ ,  $Q_2 = 1 - P_2$ ,  $\bar{P} = (P_1 + rP_2)/(r+1)$ , and  $\bar{Q} = 1 - \bar{P}$ .
